# Supplementary material for: О некоторых методиках моделирования управляемых летательных аппаратов в пакете MSC/Nastran
Source: Atypon-hosted journal article supplement (doi:10.1027/0227-5910/a000938), 2012-01-01
Supplement: 0227-5910_a000938_esm2.pdf [file 0227-5910_a000938_esm2.pdf]

**Round 1 and Round 2 questionnaire participation rates by panel**

|             | Round 1 (n) | Round 2 (n) | Completion (%) |
|-------------|-------------|-------------|----------------|
| Youth       | 27          | 24          | 88.89%         |
| Researchers | 28          | 25          | 89.29%         |
| Total       | 55          | 49          | 89.09%         |
