# Supplementary material for: О некоторых методиках моделирования управляемых летательных аппаратов в пакете MSC/Nastran
Source: Atypon-hosted journal article supplement (doi:10.1027/0227-5910/a000938), 2012-01-01
Supplement: 0227-5910_a000938_esm3.pdf [file 0227-5910_a000938_esm3.pdf]

| Item no. | Statement                                                                                                                                                         | Percent rated as essential or important |              |              |         |              |              |
|----------|-------------------------------------------------------------------------------------------------------------------------------------------------------------------|-----------------------------------------|--------------|--------------|---------|--------------|--------------|
|          |                                                                                                                                                                   | Round 1                                 |              |              | Round 2 |              |              |
|          |                                                                                                                                                                   | Youth                                   | Professional | Item results | Youth   | Professional | Item results |
|          | <b>PART 1: General principles for actively involving young people in suicide research</b>                                                                         |                                         |              |              |         |              |              |
|          | <b>Section 1: Staffing needs and expertise</b>                                                                                                                    |                                         |              |              |         |              |              |
|          | <b>Researchers should include a mental health clinician</b>                                                                                                       |                                         |              |              |         |              |              |
| 1        | <b>(hereafter referred to as clinician) on the research team</b>                                                                                                  | 96.30%                                  | 53.57%       | Rerate       | 83.33%  | 48.00%       | Exclude      |
|          | Researchers should always involve clinicians in suicide research that actively involves young people with lived or                                                |                                         |              |              |         |              |              |
| 2        | living experience                                                                                                                                                 |                                         |              | New item     | 83.33%  | 44.00%       | Exclude      |
|          | Researchers should only involve clinicians if the suicide research project is clinically-based (e.g., testing a clinical                                          |                                         |              |              |         |              |              |
| 3        | intervention)                                                                                                                                                     |                                         |              | New item     | 16.67%  | 40.00%       | Exclude      |
|          | <i>If there is a clinician on the research team, they should:</i>                                                                                                 |                                         |              |              |         |              |              |
|          | be slightly removed from day-to-day research involvement activities (e.g., play an advisory role to research team but should not be a clinician-researcher who is |                                         |              |              |         |              |              |
| 4        | embedded in the research team)                                                                                                                                    | 51.85%                                  | 39.29%       | Exclude      |         |              |              |
|          | only be involved in supporting involvement activities that                                                                                                        |                                         |              |              |         |              |              |
| 5        | last longer than an hour                                                                                                                                          | 25.93%                                  | 3.57%        | Exclude      |         |              |              |
|          | offer emotional support to researchers (e.g., debrief, support to manage difficult scenarios and young people's                                                   |                                         |              |              |         |              |              |
| 6        | wellbeing)                                                                                                                                                        | 81.48%                                  | 82.14%       | Include      |         |              |              |
| 7        | establish safety protocols                                                                                                                                        | 92.59%                                  | 78.57%       | Rerate       | 95.83%  | 80.00%       | Include      |
| 8        | be present for all involvement activities                                                                                                                         | 59.26%                                  | 14.29%       | Exclude      |         |              |              |
|          | be available on call for young people to contact them for                                                                                                         |                                         |              |              |         |              |              |
| 9        | support                                                                                                                                                           | 62.96%                                  | 67.86%       | Exclude      |         |              |              |
|          | be available on call for researchers to contact them for                                                                                                          |                                         |              |              |         |              |              |
| 10       | support                                                                                                                                                           | 66.67%                                  | 71.43%       | Exclude      |         |              |              |
|          | be responsible for responding to young people's                                                                                                                   |                                         |              |              |         |              |              |
| 11       | psychological distress                                                                                                                                            | 59.26%                                  | 50.00%       | Exclude      |         |              |              |
|          | contact young people to offer support before the                                                                                                                  |                                         |              |              |         |              |              |
| 12       | involvement activity begins (e.g., for a short phone call)                                                                                                        | 74.07%                                  | 21.43%       | Exclude      |         |              |              |
|          | be available to young people for them to contact after the                                                                                                        |                                         |              |              |         |              |              |
| 13       | involvement activity ends for an agreed amount of time (e.g.,                                                                                                     |                                         |              |              |         |              |              |
|          | 1 hour)                                                                                                                                                           | 77.78%                                  | 57.14%       | Exclude      |         |              |              |
|          | only be available to support young people during business                                                                                                         |                                         |              |              |         |              |              |
| 14       | hours                                                                                                                                                             |                                         |              | New item     | 37.50%  | 48.00%       | Exclude      |
| 15       | provide one-off, not ongoing, support                                                                                                                             |                                         |              | New item     | 33.33%  | 64.00%       | Exclude      |
| 16       | be embedded within the research team                                                                                                                              |                                         |              | New item     | 79.17%  | 68.00%       | Exclude      |
|          | Researchers should have a nominated person on the team for young people to communicate with about their safety                                                    |                                         |              |              |         |              |              |
| 17       | and wellbeing                                                                                                                                                     | 100.00%                                 | 96.43%       | Include      |         |              |              |
|          | Researchers should communicate with young people only                                                                                                             |                                         |              |              |         |              |              |
| 18       | during business hours                                                                                                                                             | 40.74%                                  | 21.43%       | Exclude      |         |              |              |
|          | If communicating with young people via phone call or text message, researchers should only do so using work devices,                                              |                                         |              |              |         |              |              |
| 19       | not their personal devices                                                                                                                                        | 81.48%                                  | 67.86%       | Rerate       | 83.33%  | 80.00%       | Include      |
|          | Researchers should ensure at least one member of the research team has experience in talking to young people                                                      |                                         |              |              |         |              |              |
| 20       | about suicide                                                                                                                                                     | 88.89%                                  | 100.00%      | Include      |         |              |              |
|          | <i>Researchers should consult with clinicians when:</i>                                                                                                           |                                         |              |              |         |              |              |
| 21       | designing involvement activities                                                                                                                                  | 85.19%                                  | 57.14%       | Rerate       | 70.83%  | 56.00%       | Exclude      |
|          | developing risk management protocol and mitigation                                                                                                                |                                         |              |              |         |              |              |
| 22       | strategies                                                                                                                                                        | 100.00%                                 | 89.29%       | Include      |         |              |              |

|                                                                                      |                                                                                                                                                                                                                                              |         |        |          |        |        |         |
|--------------------------------------------------------------------------------------|----------------------------------------------------------------------------------------------------------------------------------------------------------------------------------------------------------------------------------------------|---------|--------|----------|--------|--------|---------|
| 23                                                                                   | providing emotional support to young people during involvement activities<br><i>Researchers should make the role and availability of the clinician clear to:</i>                                                                             | 100.00% | 64.29% | Rerate   | 87.50% | 68.00% | Exclude |
| 24                                                                                   | young people                                                                                                                                                                                                                                 | 100.00% | 96.43% | Include  |        |        |         |
| 25                                                                                   | the whole research team                                                                                                                                                                                                                      | 100.00% | 96.43% | Include  |        |        |         |
| 26                                                                                   | Researchers should employ a peer researcher on the research team                                                                                                                                                                             | 74.07%  | 64.29% | Exclude  |        |        |         |
| 27                                                                                   | Researchers should provide a range of support options for young people                                                                                                                                                                       | 100.00% | 92.86% | Include  |        |        |         |
| 28                                                                                   | Researchers should ensure multiple staff members are present at involvement activities (e.g., to allow for staff members to leave involvement activities to attend to young people who need additional support or become distressed)         | 88.89%  | 92.86% | Include  |        |        |         |
| 29                                                                                   | If it is deemed unnecessary, or it is not possible, to have a clinician on the research team, researchers should partner with community organisations that can provide support to young people with lived or living experience.              |         |        | New item | 87.50% | 92.00% | Include |
| 30                                                                                   | The role of any clinician on the research team should be determined collaboratively between the clinician, the researcher, young people.<br><i>When conducting involvement activities with First Nations young people:</i>                   |         |        | New item | 58.33% | 84.00% | Exclude |
| 31                                                                                   | involvement activities should be facilitated by First Nations people                                                                                                                                                                         | 74.07%  | 71.43% | Rerate   | 58.33% | 68.00% | Exclude |
| 32                                                                                   | clinicians available to young people should be First Nations people                                                                                                                                                                          | 66.67%  | 60.71% | Exclude  |        |        |         |
| 33                                                                                   | Research teams that involve young people in suicide research should have at least one member of the research team who has a lived or living experience of suicide<br><i>Researchers who involve young people in suicide research should:</i> | 70.37%  | 46.43% | Exclude  |        |        |         |
| 34                                                                                   | have lived or living experience of suicide themselves                                                                                                                                                                                        | 51.85%  | 21.43% | Exclude  |        |        |         |
| 35                                                                                   | not have lived or living experience of suicide themselves<br><i>If researchers have their own lived or living experience of suicide they should:</i>                                                                                         | 18.52%  | 3.57%  | Exclude  |        |        |         |
| 36                                                                                   | not disclose their own lived or living experience                                                                                                                                                                                            | 18.52%  | 0.00%  | Exclude  |        |        |         |
| 37                                                                                   | disclose their own lived or living experience                                                                                                                                                                                                | 40.74%  | 7.14%  | Exclude  |        |        |         |
| 38                                                                                   | not assume their own lived or living experience is relevant to the project                                                                                                                                                                   | 70.37%  | 67.86% | Exclude  |        |        |         |
| 39                                                                                   | only disclose aspects of their own lived or living experience that they deem are relevant to the project                                                                                                                                     | 66.67%  | 60.71% | Exclude  |        |        |         |
| 40                                                                                   | Research institutions should have a policy about if and how researchers share their own lived or living experience with young people actively involved in their research                                                                     | 92.59%  | 64.29% | Rerate   | 87.50% | 80.00% | Include |
| <b>Section 2: Recruiting young people for active involvement in suicide research</b> |                                                                                                                                                                                                                                              |         |        |          |        |        |         |
| 41                                                                                   | In any application process, researchers should ask young people if they have had recent suicidal thoughts or feelings                                                                                                                        | 96.30%  | 50.00% | Rerate   | 87.50% | 48.00% | Exclude |
| 42                                                                                   | Unless is it necessary for the purpose of the research, researchers should not ask young people to disclose the details of their lived or living experience                                                                                  | 74.07%  | 89.29% | Rerate   | 75.00% | 88.00% | Exclude |
| 43                                                                                   | If asking young people if they have had current or recent suicidal thoughts or feelings, researchers should ask young people to provide details (e.g., frequency)                                                                            |         |        | New item | 54.17% | 36.00% | Exclude |

|                                                                                                                                                                                                                                                                      |                                                                         |         |          |         |                       |
|----------------------------------------------------------------------------------------------------------------------------------------------------------------------------------------------------------------------------------------------------------------------|-------------------------------------------------------------------------|---------|----------|---------|-----------------------|
| <i>Researchers should not automatically exclude young people from active involvement in suicide research due to:</i>                                                                                                                                                 |                                                                         |         |          |         |                       |
| 44                                                                                                                                                                                                                                                                   | current suicidal thoughts or feelings (e.g., within last 2 days)        | 44.44%  | 57.14%   | Exclude |                       |
| 45                                                                                                                                                                                                                                                                   | recent suicidal thoughts or feelings (e.g., within last 2 weeks)        | 77.78%  | 64.29%   | Exclude |                       |
| 46                                                                                                                                                                                                                                                                   | current self-harm (e.g., within last 2 days)                            | 48.15%  | 46.43%   | Exclude |                       |
| 47                                                                                                                                                                                                                                                                   | recent self-harm (e.g., within last 2 weeks)                            | 70.37%  | 53.57%   | Exclude |                       |
| 48                                                                                                                                                                                                                                                                   | not being legally an adult (e.g., under 18 in Australia)                | 55.56%  | 64.29%   | Exclude |                       |
| <i>Researchers should exclude young people from active involvement in suicide research if they:</i>                                                                                                                                                                  |                                                                         |         |          |         |                       |
| 49                                                                                                                                                                                                                                                                   | report current suicidal thoughts or feelings (e.g., within last 2 days) |         | New item | 50.00%  | 44.00% Exclude        |
| 50                                                                                                                                                                                                                                                                   | report recent suicidal thoughts or feelings (e.g., within last 2 weeks) |         | New item | 12.50%  | 24.00% Exclude        |
| 51                                                                                                                                                                                                                                                                   | report current self-harm (e.g., within last 2 days)                     |         | New item | 37.50%  | 36.00% Exclude        |
| 52                                                                                                                                                                                                                                                                   | recent self-harm (e.g., within last 2 weeks)                            |         | New item | 12.50%  | 20.00% Exclude        |
| 53                                                                                                                                                                                                                                                                   | are under the age of being considered an adult by the law               |         | New item | 16.67%  | 12.00% Exclude        |
| <i>If including young people with current (e.g., within last 2 days) suicidal thoughts or feelings, researchers should require young people to have the following appropriate supports in place:</i>                                                                 |                                                                         |         |          |         |                       |
| 54                                                                                                                                                                                                                                                                   | professional (e.g., psychologist)                                       | 88.89%  | 71.43%   | Rerate  | 66.67% 76.00% Exclude |
| 55                                                                                                                                                                                                                                                                   | informal (e.g., friends or family)                                      | 77.78%  | 75.00%   | Rerate  | 91.67% 80.00% Include |
| 56                                                                                                                                                                                                                                                                   | a safety plan                                                           |         | New item | 95.83%  | 96.00% Include        |
| If researchers are seeking to involve someone with lived or living experience, they should specify what type of lived or living experience they are looking for (e.g., being bereaved from suicide of someone, personal experience of suicidal thoughts or feelings) |                                                                         |         |          |         |                       |
| 57                                                                                                                                                                                                                                                                   | thoughts or feelings)                                                   | 77.78%  | 92.86%   | Rerate  | 91.67% 92.00% Include |
| Researchers should follow up with young people if they flag in the recruitment process they have current suicidal thoughts or behaviours (e.g., provide contact details of telephone/online support services)                                                        |                                                                         |         |          |         |                       |
| 58                                                                                                                                                                                                                                                                   | telephone/online support services)                                      |         | New item | 87.50%  | 92.00% Include        |
| Researchers should be open and honest with young people at the recruitment stage about potential risks and safety measures that will be put in place                                                                                                                 |                                                                         |         |          |         |                       |
| 59                                                                                                                                                                                                                                                                   | measures that will be put in place                                      |         | New item | 100.00% | 100.00% Include       |
| Researchers should screen young people to assess if they are well enough to be actively involved in suicide research prior to their active involvement                                                                                                               |                                                                         |         |          |         |                       |
| 60                                                                                                                                                                                                                                                                   | to their active involvement                                             | 81.48%  | 64.29%   | Rerate  | 50.00% 64.00% Exclude |
| Researchers should assess if young people are well enough to be actively involved on a case-by-case basis                                                                                                                                                            |                                                                         |         |          |         |                       |
| 61                                                                                                                                                                                                                                                                   | to be actively involved on a case-by-case basis                         | 74.07%  | 67.86%   | Exclude |                       |
| <i>Researchers should assess if young people are well enough to be actively involved through consulting with:</i>                                                                                                                                                    |                                                                         |         |          |         |                       |
| 62                                                                                                                                                                                                                                                                   | the young person                                                        | 100.00% | 96.43%   | Include |                       |
| the young person's parents/guardians (if the young person is under the age of being considered an adult by the law)                                                                                                                                                  |                                                                         |         |          |         |                       |
| 63                                                                                                                                                                                                                                                                   | law)                                                                    | 48.15%  | 64.29%   | Exclude |                       |
| others who know the young person (e.g., organisations they're involved with, clinicians, other named contacts)                                                                                                                                                       |                                                                         |         |          |         |                       |
| 64                                                                                                                                                                                                                                                                   | they're involved with, clinicians, other named contacts)                | 40.74%  | 39.29%   | Exclude |                       |
| <i>Those responsible for assessing if young people are well enough to be actively involved should be:</i>                                                                                                                                                            |                                                                         |         |          |         |                       |
| 65                                                                                                                                                                                                                                                                   | clinicians                                                              | 92.59%  | 57.14%   | Rerate  | 75.00% 48.00% Exclude |
| 66                                                                                                                                                                                                                                                                   | researchers                                                             | 44.44%  | 60.71%   | Exclude |                       |
| 67                                                                                                                                                                                                                                                                   | peer researchers                                                        | 40.74%  | 42.86%   | Exclude |                       |
| 68                                                                                                                                                                                                                                                                   | people with lived or living experience of suicide                       | 40.74%  | 28.57%   | Exclude |                       |
| 69                                                                                                                                                                                                                                                                   | the young people applying to be actively involved                       | 74.07%  | 78.57%   | Rerate  | 95.83% 96.00% Include |

|                                                                                                                             |                                                                                                                                                                                                                               |         |          |         |        |         |         |
|-----------------------------------------------------------------------------------------------------------------------------|-------------------------------------------------------------------------------------------------------------------------------------------------------------------------------------------------------------------------------|---------|----------|---------|--------|---------|---------|
| <i>The responsibility of determining if a young person is well enough to be actively involved should be shared between:</i> |                                                                                                                                                                                                                               |         |          |         |        |         |         |
| 70                                                                                                                          | young people and researchers                                                                                                                                                                                                  |         | New item | 62.50%  | 64.00% | Exclude |         |
| 71                                                                                                                          | clinicians and researchers                                                                                                                                                                                                    |         | New item | 54.17%  | 36.00% | Exclude |         |
| 72                                                                                                                          | young people, researchers, and clinicians                                                                                                                                                                                     |         | New item | 87.50%  | 80.00% | Include |         |
| 73                                                                                                                          | young people and clinicians                                                                                                                                                                                                   |         | New item | 79.17%  | 48.00% | Exclude |         |
| 74                                                                                                                          | Researchers should trust young people's judgement about whether or not they feel well enough to take part                                                                                                                     | 70.37%  | 78.57%   | Rerate  | 83.33% | 76.00%  | Exclude |
| 75                                                                                                                          | Young people should consider the potential impact of active involvement on their wellbeing                                                                                                                                    | 100.00% | 96.43%   | Include |        |         |         |
| 76                                                                                                                          | Young people should be honest about their symptoms/lived or living experience in the recruitment process                                                                                                                      | 100.00% | 89.29%   | Include |        |         |         |
| 77                                                                                                                          | If young people are not well enough to be actively involved, researchers should keep the young person's details on file for future opportunities when their mental health may have improved                                   | 81.48%  | 75.00%   | Rerate  | 75.00% | 76.00%  | Exclude |
| 78                                                                                                                          | If young people have any questions about the active involvement, researchers should give them the opportunity to contact a team member who is not part of the recruitment process                                             |         | New item | 54.17%  | 76.00% | Exclude |         |
| 79                                                                                                                          | <i>If researchers aren't completely satisfied that a young person is ready to engage in an involvement activity, then they should:</i>                                                                                        |         |          |         |        |         |         |
| 79                                                                                                                          | follow up with the young person                                                                                                                                                                                               | 92.59%  | 92.86%   | Include |        |         |         |
| 80                                                                                                                          | ask a clinician for their opinion                                                                                                                                                                                             | 88.89%  | 64.29%   | Rerate  | 87.50% | 64.00%  | Exclude |
| 81                                                                                                                          | ask a senior researcher for their opinion                                                                                                                                                                                     | 62.96%  | 82.14%   | Rerate  | 50.00% | 48.00%  | Exclude |
| 82                                                                                                                          | Researchers should inform young people that active involvement in research is not a replacement for professional support                                                                                                      | 100.00% | 96.43%   | Include |        |         |         |
| 83                                                                                                                          | <i>Recruitment should be done by:</i>                                                                                                                                                                                         |         |          |         |        |         |         |
| 83                                                                                                                          | telephone                                                                                                                                                                                                                     | 48.15%  | 39.29%   | Exclude |        |         |         |
| 84                                                                                                                          | video conferencing (e.g., Zoom, Facetime)                                                                                                                                                                                     | 70.37%  | 60.71%   | Exclude |        |         |         |
| 85                                                                                                                          | in person conversation                                                                                                                                                                                                        | 37.04%  | 42.86%   | Exclude |        |         |         |
| 86                                                                                                                          | survey                                                                                                                                                                                                                        | 77.78%  | 32.14%   | Exclude |        |         |         |
| 87                                                                                                                          | online expression of interest form                                                                                                                                                                                            | 85.19%  | 50.00%   | Rerate  | 70.83% | 52.00%  | Exclude |
| 88                                                                                                                          | a combination of the above (i.e. a multi-step process)                                                                                                                                                                        | 81.48%  | 82.14%   | Include |        |         |         |
| 89                                                                                                                          | Any follow ups with the young person in the recruitment period about them being ready to be actively involved should be conducted by the staff member who has previously supported, or has an existing relationship with them |         | New item | 75.00%  | 80.00% | Exclude |         |
| 90                                                                                                                          | <i>Any follow ups with a young person in the recruitment period about them being ready to be actively involved should be occur:</i>                                                                                           |         |          |         |        |         |         |
| 90                                                                                                                          | on the same day                                                                                                                                                                                                               |         | New item | 29.17%  | 20.00% | Exclude |         |
| 91                                                                                                                          | with 24 hours                                                                                                                                                                                                                 |         | New item | 54.17%  | 60.00% | Exclude |         |
| 92                                                                                                                          | within a week                                                                                                                                                                                                                 |         | New item | 66.67%  | 48.00% | Exclude |         |
| 93                                                                                                                          | <i>Those responsible for recruiting young people should be:</i>                                                                                                                                                               |         |          |         |        |         |         |
| 93                                                                                                                          | clinicians                                                                                                                                                                                                                    | 59.26%  | 35.71%   | Exclude |        |         |         |
| 94                                                                                                                          | researchers                                                                                                                                                                                                                   | 85.19%  | 82.14%   | Include |        |         |         |
| 95                                                                                                                          | people with lived or living experience of suicide                                                                                                                                                                             | 48.15%  | 46.43%   | Exclude |        |         |         |
| 96                                                                                                                          | <i>Where appropriate, young people should be recruited via:</i>                                                                                                                                                               |         |          |         |        |         |         |
| 96                                                                                                                          | their clinicians if appropriate                                                                                                                                                                                               | 74.07%  | 39.29%   | Exclude |        |         |         |
| 97                                                                                                                          | flyers in clinician waiting rooms                                                                                                                                                                                             | 59.26%  | 39.29%   | Exclude |        |         |         |
| 98                                                                                                                          | community organisations (including youth organisations)                                                                                                                                                                       | 74.07%  | 71.43%   | Rerate  | 83.33% | 84.00%  | Include |
| 99                                                                                                                          | schools and/or universities                                                                                                                                                                                                   | 51.85%  | 60.71%   | Exclude |        |         |         |
| 100                                                                                                                         | coordinators of youth advisory groups                                                                                                                                                                                         | 70.37%  | 71.43%   | Rerate  | 62.50% | 76.00%  | Exclude |

|     |                                                                                                                                                                                                                                                                          |         |         |          |         |         |         |
|-----|--------------------------------------------------------------------------------------------------------------------------------------------------------------------------------------------------------------------------------------------------------------------------|---------|---------|----------|---------|---------|---------|
| 101 | young people already actively involved in other research involvement activities (e.g., within the institution or at other institutions)                                                                                                                                  | 81.48%  | 75.00%  | Rerate   | 79.17%  | 84.00%  | Exclude |
| 102 | young people already actively involved in the research                                                                                                                                                                                                                   | 92.59%  | 71.43%  | Rerate   | 70.83%  | 84.00%  | Exclude |
| 103 | other researchers                                                                                                                                                                                                                                                        | 62.96%  | 60.71%  | Exclude  |         |         |         |
| 104 | social media                                                                                                                                                                                                                                                             | 62.96%  | 64.29%  | Exclude  |         |         |         |
| 105 | When actively involving young people from diverse backgrounds and communities (e.g., LGBTIQ+, culturally and linguistically diverse), researchers should partner with relevant local community organisations to ensure cultural differences and nuances are accommodated | 100.00% | 89.29%  | Include  |         |         |         |
| 106 | Researchers should recruit young people with diverse experiences of lived or living experience (e.g., being bereaved from suicide of someone, caring for a peer or sibling who are experiencing thoughts or feelings of suicide)                                         | 92.59%  | 67.86%  | Rerate   | 91.67%  | 88.00%  | Include |
|     | <b>Section 3: Training</b>                                                                                                                                                                                                                                               |         |         |          |         |         |         |
|     | <i>Researchers should provide young people with an induction program that covers:</i>                                                                                                                                                                                    |         |         |          |         |         |         |
| 107 | definitions of terminology commonly used in suicide research                                                                                                                                                                                                             | 88.89%  | 89.29%  | Include  |         |         |         |
| 108 | safe communication about suicide                                                                                                                                                                                                                                         | 100.00% | 100.00% | Include  |         |         |         |
| 109 | basic suicide literacy (e.g., protective factors, risk factors, suicide prevention strategies)                                                                                                                                                                           | 92.59%  | 89.29%  | Include  |         |         |         |
| 110 | the diverse lived or living experiences of suicidal people                                                                                                                                                                                                               | 88.89%  | 89.29%  | Include  |         |         |         |
| 111 | processes for conducting ethical suicide research content tailored to the needs/knowledge gaps identified                                                                                                                                                                |         |         | New item | 83.33%  | 100.00% | Include |
| 112 | by young people                                                                                                                                                                                                                                                          |         |         | New item | 87.50%  | 92.00%  | Include |
| 113 | how to support themselves and take care of their wellbeing                                                                                                                                                                                                               |         |         | New item | 91.67%  | 100.00% | Include |
|     | <i>Any training should be delivered by or in collaboration with:</i>                                                                                                                                                                                                     |         |         |          |         |         |         |
| 114 | an accredited and relevant organisation (e.g. LivingWorks, Roses in the Ocean, Papyrus)                                                                                                                                                                                  |         |         | New item | 75.00%  | 48.00%  | Exclude |
| 115 | peers (young people with lived or living experience)                                                                                                                                                                                                                     |         |         | New item | 75.00%  | 76.00%  | Exclude |
| 116 | researchers                                                                                                                                                                                                                                                              |         |         | New item | 66.67%  | 72.00%  | Exclude |
| 117 | clinicians                                                                                                                                                                                                                                                               |         |         | New item | 66.67%  | 32.00%  | Exclude |
| 118 | Researchers should train young people how to support/intervene when another person is experiencing suicidal or psychological distress during their active involvement                                                                                                    | 44.44%  | 57.14%  | Exclude  |         |         |         |
|     | <i>Research institutions should provide researchers with training on:</i>                                                                                                                                                                                                |         |         |          |         |         |         |
| 119 | evidence-based youth suicide prevention/intervention skills                                                                                                                                                                                                              | 100.00% | 96.43%  | Include  |         |         |         |
| 120 | how to assess and manage general distress                                                                                                                                                                                                                                | 100.00% | 96.43%  | Include  |         |         |         |
| 121 | how to manage and contain difficult conversations that may arise (e.g., about traumatic lived or living experiences, suicide attempts, etc.)                                                                                                                             | 100.00% | 96.43%  | Include  |         |         |         |
| 122 | how to support young people to share their lived or living experience (e.g. identifying and asserting personal boundaries, safe communication)                                                                                                                           |         |         | New item | 100.00% | 96.00%  | Include |
| 123 | how to support themselves and take care of their wellbeing prior to involvement                                                                                                                                                                                          |         |         | New item | 87.50%  | 96.00%  | Include |
|     | <i>If young people are actively involved in recruitment, researchers should provide them with:</i>                                                                                                                                                                       |         |         |          |         |         |         |
| 124 | training on how to navigate difficult conversations that may arise (such as the disclosure of suicide risk or trauma)                                                                                                                                                    | 96.30%  | 96.43%  | Exclude* |         |         |         |

|                                                                                                                                                                                                     |         |         |          |        |        |         |
|-----------------------------------------------------------------------------------------------------------------------------------------------------------------------------------------------------|---------|---------|----------|--------|--------|---------|
| a script for recruitment, (e.g., for social media or discussions to have in person), which helps them navigate conversations that may arise around suicide or potential disclosures of suicide risk | 70.37%  | 92.86%  | Exclude* |        |        |         |
| the opportunity to role-play the recruitment process (e.g., how to invite people to complete a survey)                                                                                              | 66.67%  | 89.29%  | Exclude* |        |        |         |
| Young people should know how to safely communicate about their active involvement to their peers and the wider community                                                                            | 100.00% | 92.86%  | Include  |        |        |         |
| If young people are co-designing/developing an intervention, researchers should provide ongoing guidance to young people in relation to safe messaging guidelines                                   | 92.59%  | 92.86%  | Include  |        |        |         |
| <b>Section 4: Establishing safety protocols</b>                                                                                                                                                     |         |         |          |        |        |         |
| Researchers should develop comprehensive protocols to ensure the ongoing safety of young people                                                                                                     | 100.00% | 100.00% | Include  |        |        |         |
| <i>Protocols should include:</i>                                                                                                                                                                    |         |         |          |        |        |         |
| how to respond if a young person becomes distressed during active involvement                                                                                                                       | 100.00% | 100.00% | Include  |        |        |         |
| how to respond if a young person discloses current suicidal thoughts and feelings                                                                                                                   | 100.00% | 100.00% | Include  |        |        |         |
| how to respond if a young person discloses suicidal intent or plans                                                                                                                                 | 100.00% | 96.43%  | Include  |        |        |         |
| how to respond to a suicide attempt during the course of a young person's active involvement                                                                                                        | 96.30%  | 96.43%  | Include  |        |        |         |
| room for flexibility to adapt to the individual support needs of young people                                                                                                                       | 96.30%  | 89.29%  | Include  |        |        |         |
| room for flexibility to adapt to the individual support needs of researchers                                                                                                                        | 92.59%  | 82.14%  | Include  |        |        |         |
| flowcharts that help researchers to assess young people's risk                                                                                                                                      | 74.07%  | 82.14%  | Rerate   | 87.50% | 72.00% | Exclude |
| guidance around minimising risk specific to the type or nature of active involvement activities (e.g., for in-person vs remote involvement activities, one-off vs ongoing)                          | 92.59%  | 85.71%  | Include  |        |        |         |
| information about the role of all team members in supporting young people (e.g., researchers, clinicians) if/when confidentiality will be broken in the interest of the young person's safety       | 100.00% | 100.00% | Include  |        |        |         |
| an overview of researchers' responsibilities in managing and preventing risk                                                                                                                        | 100.00% | 96.43%  | Include  |        |        |         |
| <i>Researchers should develop risk management protocols that address the needs of:</i>                                                                                                              |         |         |          |        |        |         |
| young people                                                                                                                                                                                        | 100.00% | 96.43%  | Include  |        |        |         |
| researchers                                                                                                                                                                                         | 100.00% | 92.86%  | Include  |        |        |         |
| clinicians                                                                                                                                                                                          | 92.59%  | 64.29%  | Rerate   | 79.17% | 56.00% | Exclude |
| any other staff on the research team (e.g., administrative staff / project managers)                                                                                                                | 81.48%  | 71.43%  | Rerate   | 87.50% | 84.00% | Include |
| anyone who may access the data (e.g. transcription services/ interpreters)                                                                                                                          | 77.78%  | 57.14%  | Exclude  |        |        |         |
| <i>Researchers should develop policies in consultation with:</i>                                                                                                                                    |         |         |          |        |        |         |
| clinicians                                                                                                                                                                                          | 100.00% | 89.29%  | Include  |        |        |         |
| young people                                                                                                                                                                                        | 92.59%  | 92.86%  | Include  |        |        |         |
| Policies should be regularly reviewed (e.g., annually)                                                                                                                                              | 88.89%  | 85.71%  | Include  |        |        |         |
| Researchers should provide young people with a copy of protocols                                                                                                                                    | 96.30%  | 82.14%  | Include  |        |        |         |
| <i>Researchers should invite young people to provide the following information on a safety and wellbeing plan:</i>                                                                                  |         |         |          |        |        |         |
| personal contact details (e.g. phone number, home address, address of location at time of involvement if engaging remotely)                                                                         |         |         | New item | 75.00% | 92.86% | Exclude |

|     |                                                                                                                                                                                                                                                                                                      |         |        |          |        |         |         |
|-----|------------------------------------------------------------------------------------------------------------------------------------------------------------------------------------------------------------------------------------------------------------------------------------------------------|---------|--------|----------|--------|---------|---------|
| 151 | emergency contact details<br>contact details of the young person's mental health                                                                                                                                                                                                                     |         |        | New item | 87.50% | 100.00% | Include |
| 152 | clinician or other professional supports<br>key medical details, e.g., medications, allergies, dietary                                                                                                                                                                                               |         |        | New item | 66.67% | 57.14%  | Exclude |
| 153 | requirements                                                                                                                                                                                                                                                                                         |         |        | New item | 58.33% | 35.71%  | Exclude |
| 154 | any mental health diagnoses<br>known signs and symptoms that the young person might                                                                                                                                                                                                                  |         |        | New item | 54.17% | 21.43%  | Exclude |
| 155 | show should they become distressed<br>details of anything the young people might find                                                                                                                                                                                                                |         |        | New item | 91.67% | 71.43%  | Exclude |
| 156 | distressing or especially difficult<br>personalised coping strategies (e.g., self-care, self-                                                                                                                                                                                                        |         |        | New item | 95.83% | 82.14%  | Include |
| 157 | management strategies)<br>the young person's preferred method of contact (e.g., text                                                                                                                                                                                                                 |         |        | New item | 83.33% | 89.29%  | Include |
| 158 | message, phone call)<br>tips from the young person about what they find                                                                                                                                                                                                                              |         |        | New item | 87.50% | 89.29%  | Include |
| 159 | helpful/supportive should they become distressed<br>a plan for the young person to enact immediately after                                                                                                                                                                                           |         |        | New item | 91.67% | 96.43%  | Include |
| 160 | the involvement activity to boost their mood                                                                                                                                                                                                                                                         |         |        | New item | 70.83% | 82.14%  | Exclude |
|     | <i>Any safety and wellbeing plans for young people should be:</i><br>optional for young people to complete prior to active                                                                                                                                                                           |         |        |          |        |         |         |
| 161 | involvement<br>mandatory for young people to complete prior to active                                                                                                                                                                                                                                | 37.04%  | 25.00% | Exclude  |        |         |         |
| 162 | involvement<br><i>In addition to collecting personalised information from<br/>young people, any safety and wellbeing plan should contain<br/>the following information:</i><br>an overview of specific steps the researcher will take if<br>they think young people are at immediate risk of harm to | 51.85%  | 60.71% | Exclude  |        |         |         |
| 163 | themselves or others<br>a reminder to young people about available support<br>resources (e.g., contact details of telephone/online support                                                                                                                                                           | 92.59%  | 89.29% | Include  |        |         |         |
| 164 | services)<br><i>A template should be developed for any safety and wellbeing<br/>plan, and this should be:</i><br>co-designed with young people (i.e., designed, developed,                                                                                                                           | 100.00% | 92.86% | Include  |        |         |         |
| 165 | and written collaboratively)                                                                                                                                                                                                                                                                         | 96.30%  | 92.86% | Include  |        |         |         |
| 166 | individualised to each young person's needs<br>designed, developed, and written by one or multiple                                                                                                                                                                                                   | 77.78%  | 75.00% | Rerate   | 79.17% | 92.00%  | Exclude |
| 167 | clinicians<br><i>Any safety and wellbeing plan should be:</i><br>completed by the young person prior to active                                                                                                                                                                                       | 85.19%  | 35.71% | Rerate   | 70.83% | 28.00%  | Exclude |
| 168 | involvement<br>require a signature from the young person to show their                                                                                                                                                                                                                               | 88.89%  | 85.71% | Include  |        |         |         |
| 169 | understanding and agreement with the document<br>be updated regularly throughout a young person's active                                                                                                                                                                                             | 59.26%  | 71.43% | Exclude  |        |         |         |
| 170 | involvement<br>be updated whenever a young person re-engages with                                                                                                                                                                                                                                    | 66.67%  | 60.71% | Exclude  |        |         |         |
| 171 | the research project after a break from the project<br>Researchers should give young people a choice between<br>completing a full safety and wellbeing plan or a shortened<br>version with only essential information (e.g., personal and                                                            | 88.89%  | 85.71% | Include  |        |         |         |
| 172 | emergency contact details)<br><i>Researchers should develop a safety and wellbeing plan:</i><br>at the start of active involvement (immediately after                                                                                                                                                | 62.96%  | 50.00% | Exclude  |        |         |         |
| 173 | recruitment/prior to commencement)<br>once they have developed a strong rapport with the                                                                                                                                                                                                             | 88.89%  | 57.14% | Rerate   | 87.50% | 96.00%  | Include |
| 174 | young person<br>If researchers invite young people to create a safety and<br>wellbeing plan prior to participating, they should not require                                                                                                                                                          | 51.85%  | 39.29% | Exclude  |        |         |         |
| 175 | the young people to share this with them                                                                                                                                                                                                                                                             | 29.63%  | 10.71% | Exclude  |        |         |         |

|     |                                                                                                                                        |         |         |          |         |        |         |
|-----|----------------------------------------------------------------------------------------------------------------------------------------|---------|---------|----------|---------|--------|---------|
| 176 | Researchers should meet with young people to discuss the contents of any safety and wellbeing plan before it is completed              | 33.33%  | 42.86%  | Exclude  |         |        |         |
| 177 | Young people should be invited to complete any safety and wellbeing plan:<br>in private                                                | 85.19%  | 71.43%  | Rerate   | 79.17%  | 76.00% | Exclude |
| 178 | in their own time                                                                                                                      | 70.37%  | 67.86%  | Exclude  |         |        |         |
| 179 | with the researcher                                                                                                                    | 40.74%  | 32.14%  | Exclude  |         |        |         |
|     | <i>Researchers should keep a record of any wellness plans:</i>                                                                         |         |         |          |         |        |         |
| 180 | in hard-copy                                                                                                                           |         |         | New item | 45.83%  | 16.00% | Exclude |
| 181 | in soft-copy (electronic)                                                                                                              |         |         | New item | 87.50%  | 72.00% | Exclude |
| 182 | Researchers should offer all young people the same support options, with support provided based on individual needs.                   |         |         | New item | 91.67%  | 96.00% | Include |
| 183 | Researchers should consult safety and wellbeing plans ahead of involvement activities to become familiar with individual support needs | 88.89%  | 92.86%  | Include  |         |        |         |
|     | <i>Researchers should take time to identify support needs of:</i>                                                                      |         |         |          |         |        |         |
| 184 | young people                                                                                                                           | 100.00% | 96.43%  | Include  |         |        |         |
| 185 | themselves                                                                                                                             | 100.00% | 92.86%  | Include  |         |        |         |
| 186 | other researchers and staff members involved in the project                                                                            | 100.00% | 82.14%  | Include  |         |        |         |
|     | <i>Researchers should provide information about available supports (e.g., crisis services, etc.):</i>                                  |         |         |          |         |        |         |
| 187 | verbally only                                                                                                                          | 22.22%  | 14.29%  | Exclude  |         |        |         |
| 188 | in writing only                                                                                                                        | 33.33%  | 21.43%  | Exclude  |         |        |         |
| 189 | both verbally and in writing                                                                                                           | 100.00% | 89.29%  | Include  |         |        |         |
|     | <i>Researchers should provide young people with:</i>                                                                                   |         |         |          |         |        |         |
| 190 | information on how to get support (e.g., national crisis lines)                                                                        | 100.00% | 92.86%  | Include  |         |        |         |
| 191 | resource lists that are tailored to the individual (e.g., personalised, culturally relevant, local resources)                          | 85.19%  | 78.57%  | Rerate   | 91.67%  | 68.00% | Exclude |
| 192 | tools that young people can use to maintain their wellbeing safety (e.g., self-care activities, safety planning tools)                 | 96.30%  | 89.29%  | Include  |         |        |         |
| 193 | contact details of a nominated person on the team for young people to communicate with about their safety and wellbeing                | 96.30%  | 89.29%  | Include  |         |        |         |
| 194 | contact details for any clinical staff member who is available to offer clinical support                                               | 85.19%  | 85.71%  | Include  |         |        |         |
| 195 | Researchers should offer support that meets the needs of diverse young people (e.g., those with disability, neurodiverse)              |         |         | New item | 100.00% | 92.00% | Include |
|     | <i>Researchers should actively encourage young people to:</i>                                                                          |         |         |          |         |        |         |
| 196 | monitor their own mood and wellbeing throughout their active involvement                                                               | 100.00% | 96.43%  | Include  |         |        |         |
| 197 | seek support if they need it                                                                                                           | 100.00% | 100.00% | Include  |         |        |         |
| 198 | Researchers should have access to professional supervision to help navigate the relevant challenges of actively involving young people | 92.59%  | 92.86%  | Include  |         |        |         |
|     | <i>If researchers have access to professional supervision, this supervisor should be:</i>                                              |         |         |          |         |        |         |
| 199 | clinician outside of the immediate research team to ensure neutrality                                                                  | 70.37%  | 39.29%  | Exclude  |         |        |         |
| 200 | a researcher outside of the immediate research team to ensure neutrality                                                               | 48.15%  | 32.14%  | Exclude  |         |        |         |
| 201 | a clinician working on the research project                                                                                            | 40.74%  | 17.86%  | Exclude  |         |        |         |
| 202 | other members of the research team                                                                                                     | 22.22%  | 17.86%  | Exclude  |         |        |         |



|                                                                                                                                                                                                              |                                                |         |         |          |        |        |
|--------------------------------------------------------------------------------------------------------------------------------------------------------------------------------------------------------------|------------------------------------------------|---------|---------|----------|--------|--------|
| <i>If researchers have access to professional supervision, support should be provided to researchers:</i>                                                                                                    |                                                |         |         |          |        |        |
| 203                                                                                                                                                                                                          | through scheduled weekly sessions              | 51.85%  | 21.43%  | Exclude  |        |        |
| 204                                                                                                                                                                                                          | through ad hoc support                         | 51.85%  | 67.86%  | Exclude  |        |        |
| 205                                                                                                                                                                                                          | in a one-to-one setting                        | 74.07%  | 57.14%  | Exclude  |        |        |
| 206                                                                                                                                                                                                          | in a group setting                             | 48.15%  | 28.57%  | Exclude  |        |        |
| If researchers do not feel that appropriate mechanisms are in place to ensure the safety of young people, they should delay the involvement activity (until those mechanisms are in place)                   |                                                |         |         |          |        |        |
| 207                                                                                                                                                                                                          |                                                | 85.19%  | 92.86%  | Include  |        |        |
| <i>If actively involving young people online, researchers should:</i>                                                                                                                                        |                                                |         |         |          |        |        |
| 208                                                                                                                                                                                                          | ask young people to identify a quiet place     | 88.89%  | 64.29%  | Rerate   | 75.00% | 88.00% |
| 209                                                                                                                                                                                                          | encourage young people to keep their camera on | 40.74%  | 35.71%  | Exclude  |        |        |
| <i>When actively involving young people online, researchers should create a 'safe environment' by:</i>                                                                                                       |                                                |         |         |          |        |        |
| conducting an initial active involvement session just with young people (any other stakeholders e.g., clinicians should not be present)                                                                      |                                                |         |         |          |        |        |
| 210                                                                                                                                                                                                          |                                                | 70.37%  | 60.71%  | Exclude  |        |        |
| conducting active involvement sessions with only a small number of young people (e.g., under 5 young people) addressing the topic of suicide directly, safely, and confidently                               |                                                |         |         |          |        |        |
| 211                                                                                                                                                                                                          |                                                | 81.48%  | 60.71%  | Rerate   | 79.17% | 60.00% |
| 212                                                                                                                                                                                                          |                                                | 96.30%  | 85.71%  | Include  |        |        |
| Young people should access the support that is available to them through the research process                                                                                                                |                                                |         |         |          |        |        |
| 213                                                                                                                                                                                                          |                                                | 81.48%  | 35.71%  | Rerate   | 45.83% | 28.00% |
| Researchers should explore with young people what a safe space means and how to make and keep it safe.                                                                                                       |                                                |         |         |          |        |        |
| 214                                                                                                                                                                                                          |                                                |         |         | New item | 87.50% | 92.00% |
| Young people should ask for support (or more support) if they need it                                                                                                                                        |                                                |         |         |          |        |        |
| 215                                                                                                                                                                                                          |                                                | 96.30%  | 82.14%  | Include  |        |        |
| Researchers should adjust involvement activities to accommodate young people's needs and preferences (e.g., having a support person attend, having a camera off during online meetings, frequency of breaks) |                                                |         |         |          |        |        |
| 216                                                                                                                                                                                                          |                                                | 100.00% | 89.29%  | Include  |        |        |
| <b>Section 5: Before commencing active involvement</b>                                                                                                                                                       |                                                |         |         |          |        |        |
| Researchers should assess young people's mood immediately prior to involvement activities                                                                                                                    |                                                |         |         |          |        |        |
| 217                                                                                                                                                                                                          |                                                | 77.78%  | 53.57%  | Exclude  |        |        |
| <i>If assessing young people's mood prior to active involvement, researchers should conduct do so via:</i>                                                                                                   |                                                |         |         |          |        |        |
| 218                                                                                                                                                                                                          | a survey                                       | 44.44%  | 7.14%   | Exclude  |        |        |
| 219                                                                                                                                                                                                          | an interview                                   | 25.93%  | 10.71%  | Exclude  |        |        |
| 220                                                                                                                                                                                                          | an informal discussion                         | 74.07%  | 71.43%  | Rerate   | 75.00% | 80.00% |
| Researchers should dedicate sufficient project time for building rapport with young people in order to create a 'safe space'                                                                                 |                                                |         |         |          |        |        |
| 221                                                                                                                                                                                                          |                                                | 96.30%  | 100.00% | Include  |        |        |
| Researchers should send young people information about available support services prior to starting their active involvement (e.g., crisis support services)                                                 |                                                |         |         |          |        |        |
| 222                                                                                                                                                                                                          |                                                | 96.30%  | 92.86%  | Include  |        |        |
| Researchers should tell young people about what to expect in each involvement activity in advance (e.g. sensitive topics, structure of the involvement activity and any preparation needed)                  |                                                |         |         |          |        |        |
| 223                                                                                                                                                                                                          |                                                | 100.00% | 100.00% | Include  |        |        |
| Researchers should review young people's safety and wellbeing plans (if applicable) prior to involvement activities                                                                                          |                                                |         |         |          |        |        |
| 224                                                                                                                                                                                                          |                                                | 74.07%  | 75.00%  | Rerate   | 75.00% | 92.00% |
| Researchers should inform young people of the potential benefits of being actively involved in suicide research                                                                                              |                                                |         |         |          |        |        |
| 225                                                                                                                                                                                                          |                                                |         |         | New item | 87.50% | 96.00% |
| Researchers should inform young people that they are not able to provide clinical support, but can direct people to available support if needed                                                              |                                                |         |         |          |        |        |
| 226                                                                                                                                                                                                          |                                                |         |         | New item | 95.83% | 96.00% |

|     |                                                                                                                                                                                                                                                  |         |         |          |        |         |         |
|-----|--------------------------------------------------------------------------------------------------------------------------------------------------------------------------------------------------------------------------------------------------|---------|---------|----------|--------|---------|---------|
| 227 | Researchers should inform young people of the potential stress of being actively involved in suicide-related research                                                                                                                            | 100.00% | 96.43%  | Include  |        |         |         |
| 228 | Young people should outline their boundaries prior to engaging in involvement activities (e.g., what aspects of their lived or living experience they are not prepared to disclose/discuss)                                                      | 96.30%  | 85.71%  | Include  |        |         |         |
| 229 | Young people should save the numbers of helplines in their phones prior to engaging in involvement activities, in case they are needed during or after the event                                                                                 | 55.56%  | 42.86%  | Exclude  |        |         |         |
| 230 | Young people should line up support prior to engaging in involvement activities (e.g., letting a friend, family member or health professional know in advance that they may require support after the event)                                     | 70.37%  | 57.14%  | Exclude  |        |         |         |
|     | <b>Section 6: Setting up and conducting group activities</b>                                                                                                                                                                                     |         |         |          |        |         |         |
|     | <i>Researchers should tell young people that:</i>                                                                                                                                                                                                |         |         |          |        |         |         |
| 231 | it is a safe and supportive environment                                                                                                                                                                                                          |         |         | New item | 91.67% | 88.00%  | Include |
| 232 | it's understandable that topics may be upsetting they should respect that everyone's own lived or living experience is different                                                                                                                 |         |         | New item | 95.83% | 96.00%  | Include |
| 233 | Where possible researchers should offer young people a range of involvement activities to choose from                                                                                                                                            |         |         | New item | 95.83% | 100.00% | Include |
| 234 | If additional young people join a group or ongoing involvement activities, researchers should revisit practices / group rules                                                                                                                    |         |         | New item | 79.17% | 92.00%  | Exclude |
| 235 | If the activities are being recorded, researchers should pause the recording during introductions, wellness plan discussions and other parts of the activity where confidential discussions take place                                           |         |         | New item | 87.50% | 92.00%  | Include |
| 236 | Researchers should seek consent from young people to record any activities, and inform young people what these recordings will be used for                                                                                                       |         |         | New item | 83.33% | 80.00%  | Include |
| 237 | <i>At the beginning of young people's active involvement, researchers should spend time with young people:</i>                                                                                                                                   |         |         |          |        |         |         |
| 238 | discussing and agreeing on a set of group practices (or 'rules') (e.g., sharing their lived or living experience)                                                                                                                                | 100.00% | 96.43%  | Include  |        |         |         |
| 239 | getting to know each other                                                                                                                                                                                                                       | 85.19%  | 85.71%  | Include  |        |         |         |
| 240 | At any subsequent involvement activities, researchers should review the practices (or 'rules') with young people to check they are still in agreement about them                                                                                 | 85.19%  | 92.86%  | Include  |        |         |         |
| 241 | <i>Researchers should remind young people that:</i>                                                                                                                                                                                              |         |         |          |        |         |         |
| 242 | the research is about suicide, and this may be sensitive, uncomfortable, or distressing for some people that they can withdraw, pause, or change the nature or extent of, their active involvement at any time without any negative consequences | 100.00% | 100.00% | Include  |        |         |         |
| 243 | <i>Researchers should tell young people that:</i>                                                                                                                                                                                                |         |         |          |        |         |         |
| 244 | they can disclose their lived or living experience of suicide if they want to, but it's not expected or required that they do so                                                                                                                 | 92.59%  | 89.29%  | Include  |        |         |         |
| 245 | they should be respectful and sensitive if other people disclose their lived or living experience                                                                                                                                                | 100.00% | 92.86%  | Include  |        |         |         |
| 246 | they should respect others' privacy and not repeat discussions outside of the group                                                                                                                                                              | 100.00% | 100.00% | Include  |        |         |         |
| 247 | if they are worried or upset it's okay to step away or take a break                                                                                                                                                                              | 100.00% | 100.00% | Include  |        |         |         |
| 248 | if they do step away or take a break they should let the researcher (or person leading the involvement activity) know                                                                                                                            | 88.89%  | 100.00% | Include  |        |         |         |

|     |                                                                                                                                                                                                                                                                |        |        |          |        |        |         |
|-----|----------------------------------------------------------------------------------------------------------------------------------------------------------------------------------------------------------------------------------------------------------------|--------|--------|----------|--------|--------|---------|
| 248 | Researchers should ensure there are clear boundaries between research involvement activities and wellbeing support involvement activities (e.g., informing young people that a conversation about wellbeing is not being recorded for the purpose of research) | 96.30% | 92.86% | Include  |        |        |         |
| 249 | Researchers should use a range of options to support young people's different sensory needs when engaging in involvement activities (e.g., sensory toys, dimming lights, choice of music)                                                                      | 85.19% | 82.14% | Include  |        |        |         |
| 250 | <i>Researchers should consider establishing a group chat (e.g., via WhatsApp):</i><br>for young people actively involved in the research project to facilitate peer to peer support                                                                            | 48.15% | 17.86% | Exclude  |        |        |         |
| 251 | for group facilitators to allow for discreet communication during involvement activities (e.g., to discuss concerns about young people's wellbeing)                                                                                                            | 77.78% | 50.00% | Exclude  |        |        |         |
| 252 | Researchers should reschedule involvement activities if young people are not feeling well enough to engage at that moment in time                                                                                                                              | 85.19% | 75.00% | Rerate   | 66.67% | 88.00% | Exclude |
| 253 | Young people should reschedule involvement activities if they're not feeling up to engaging at that moment in time                                                                                                                                             | 85.19% | 82.14% | Include  |        |        |         |
| 254 | Young people should pause or change the nature or extent of their active involvement when they feel it is in their best interest                                                                                                                               | 96.30% | 92.86% | Include  |        |        |         |
|     | <b>Section 7: In what setting should active involvement take place?</b>                                                                                                                                                                                        |        |        |          |        |        |         |
|     | <i>Active involvement activities should take place:</i>                                                                                                                                                                                                        |        |        |          |        |        |         |
| 255 | online                                                                                                                                                                                                                                                         | 66.67% | 35.71% | Exclude  |        |        |         |
| 256 | in-person                                                                                                                                                                                                                                                      | 51.85% | 35.71% | Exclude  |        |        |         |
|     | <i>If in-person, active involvement activities should take place in:</i>                                                                                                                                                                                       |        |        |          |        |        |         |
| 257 | community settings (e.g., school, youth hub, library)                                                                                                                                                                                                          | 29.63% | 39.29% | Exclude  |        |        |         |
| 258 | clinical settings, (e.g., mental health service)                                                                                                                                                                                                               | 44.44% | 7.14%  | Exclude  |        |        |         |
| 259 | research settings (e.g., university)                                                                                                                                                                                                                           | 44.44% | 14.29% | Exclude  |        |        |         |
|     | <i>If in-person, researchers should:</i>                                                                                                                                                                                                                       |        |        |          |        |        |         |
| 260 | consider open plan venues to ensure there is good visibility of young people in order to monitor wellbeing                                                                                                                                                     | 70.37% | 53.57% | Exclude  |        |        |         |
| 261 | ensure breakout rooms are available for young people to use if they need a break                                                                                                                                                                               | 96.30% | 78.57% | Rerate   | 95.83% | 92.00% | Include |
| 262 | conduct involvement activities in a private, quiet space                                                                                                                                                                                                       | 96.30% | 71.43% | Rerate   | 95.83% | 88.00% | Include |
|     | <b>Section 8: Debrief &amp; cool down</b>                                                                                                                                                                                                                      |        |        |          |        |        |         |
|     | Following involvement activities, researchers should facilitate a debrief discussion, where young people are given a chance to reflect and share challenges and learnings from the involvement activity                                                        | 92.59% | 85.71% | Include  |        |        |         |
|     | <i>Debrief involvement activities should be:</i>                                                                                                                                                                                                               |        |        |          |        |        |         |
| 264 | optional                                                                                                                                                                                                                                                       | 76.92% | 78.57% | Rerate   | 62.50% | 40.00% | Exclude |
| 265 | mandatory                                                                                                                                                                                                                                                      | 14.81% | 21.43% | Exclude  |        |        |         |
|     | <i>Debrief involvement activities should be:</i>                                                                                                                                                                                                               |        |        |          |        |        |         |
| 266 | conducted only if needed (e.g. if a young person has found a topic challenging)                                                                                                                                                                                |        |        | New item | 41.67% | 40.00% | Exclude |
|     | When conducting a cool-down, researchers should not conduct a mindfulness exercise as drawing attention to the body can be uncomfortable for some participants after                                                                                           |        |        |          |        |        |         |
| 267 | discussing self-harm and suicide                                                                                                                                                                                                                               |        |        | New item | 66.67% | 52.00% | Exclude |
|     | When conducting a group cool-down, researchers should remind young people they are welcome to speak with them                                                                                                                                                  |        |        |          |        |        |         |
| 268 | one-on-one afterwards too                                                                                                                                                                                                                                      |        |        | New item | 91.67% | 84.00% | Include |

|     |                                                                                                                                                                                                                     |        |        |          |        |         |         |
|-----|---------------------------------------------------------------------------------------------------------------------------------------------------------------------------------------------------------------------|--------|--------|----------|--------|---------|---------|
| 269 | When conducting an in-person cool-down, where possible, researchers should conduct the cool-down in a physically different space in order to assist young people to unwind from the main activities                 |        |        | New item | 50.00% | 32.00%  | Exclude |
| 270 | Researchers should give young people the option to choose between one-on-one debriefing and group reflection/debrief                                                                                                |        |        | New item | 83.33% | 80.00%  | Include |
| 271 | If researchers conduct a debrief with participants, this should occur as a group for group activities or one-on-one if the activity was an individual activity                                                      |        |        | New item | 66.67% | 20.00%  | Exclude |
| 272 | <i>Researchers should conduct debrief involvement activities with young people:</i><br>on a one-to-one basis                                                                                                        | 44.44% | 21.43% | Exclude  |        |         |         |
| 273 | as a group with researchers facilitating                                                                                                                                                                            | 70.37% | 46.43% | Exclude  |        |         |         |
| 274 | Researchers should conduct a closing activity after involvement activities (e.g., mindfulness exercise, mood elevating activity such as cute animal video, grounding exercise)                                      | 77.78% | 57.14% | Exclude  |        |         |         |
| 275 | Researchers should encourage young people to schedule a self-care, or pleasant activity after their involvement activity (e.g., watching a favourite movie, talking on the phone with a friend, playing with a pet) | 92.59% | 82.14% | Include  |        |         |         |
|     | <b>Section 9: Routinely checking in with young people about their wellbeing</b>                                                                                                                                     |        |        |          |        |         |         |
| 276 | Researchers should regularly check-in with young people about their wellbeing                                                                                                                                       | 92.59% | 85.71% | Include  |        |         |         |
| 277 | Researchers should give young people the option to choose between one-on-one debriefing and group reflection/debrief                                                                                                |        |        | New item | 83.33% | 80.00%  | Include |
| 278 | If researchers conduct a debrief with participants, this should occur as a group for group activities or one-on-one if the activity was an individual activity                                                      |        |        | New item | 66.67% | 20.00%  | Exclude |
| 279 | <i>If conducting a check in with young people, researchers should conduct it:</i><br>only if they are concerned about a young person with all young people who be involved in activities,                           | 29.63% | 46.43% | Exclude  |        |         |         |
| 280 | regardless of concerns                                                                                                                                                                                              | 77.78% | 78.57% | Rerate   | 62.50% | 96.00%  | Exclude |
| 281 | within 24 hours following a specific involvement activity within approximately one week following an involvement                                                                                                    | 66.67% | 28.57% | Exclude  |        |         |         |
| 282 | activity                                                                                                                                                                                                            |        |        | New item | 91.67% | 88.00%  | Include |
| 283 | Responsibility to follow-up with young people after an involvement activity should be whoever has developed the relationship with the young person, regardless of their position on the team                        |        |        | New item | 58.33% | 68.00%  | Exclude |
| 284 | If a young person doesn't respond to check-in calls, researchers should attempt to contact young people via a different form of communication                                                                       |        |        | New item | 95.83% | 92.00%  | Include |
| 285 | Researchers should set expectations with young people around what kinds of support will be provided                                                                                                                 |        |        | New item | 95.83% | 100.00% | Include |
| 286 | Researchers should clearly communicate to young people which staff member they can contact for support                                                                                                              |        |        | New item | 95.83% | 100.00% | Include |
| 287 | Researchers should encourage young people to provide peer support to other young people in the project                                                                                                              |        |        | New item | 25.00% | 20.00%  | Exclude |
| 288 | Researchers should encourage young people to consider who to contact if the researcher is not available                                                                                                             |        |        | New item | 87.50% | 88.00%  | Include |
| 289 | When conducting a check-in, researchers should not solely be looking for distress or worsening of suicidality, but also check-in broadly around the young person's wellbeing                                        |        |        | New item | 95.83% | 88.00%  | Include |

|     |                                                                                                                                                                                                       |         |         |          |        |        |         |
|-----|-------------------------------------------------------------------------------------------------------------------------------------------------------------------------------------------------------|---------|---------|----------|--------|--------|---------|
| 290 | If concerned about a young person's wellbeing following an activity, researchers should check in with the young person on the same day                                                                |         |         | New item | 91.67% | 84.00% | Include |
| 291 | Researchers should conduct any check-ins during research activities, not afterwards.                                                                                                                  |         |         | New item | 16.67% | 20.00% | Exclude |
| 292 | If conducting a check-in, researchers should be led by the young person and ask them what support is going to be most helpful for them                                                                |         |         | New item | 75.00% | 92.00% | Exclude |
| 293 | Researchers should communicate any concerns about participant wellbeing to any clinician or Chief/Principal Investigator on the project to keep them informed                                         |         |         | New item | 95.83% | 80.00% | Include |
| 294 | Check-ins should be conducted by one specific team member (to streamline and simplify communication)                                                                                                  |         |         | New item | 37.50% | 24.00% | Exclude |
| 295 | Researchers should have a dedicated communication line for young people to contact them                                                                                                               |         |         | New item | 83.33% | 72.00% | Exclude |
| 296 | Researchers should ensure any dedicated communication line is monitored 24/7                                                                                                                          |         |         | New item | 41.67% | 32.00% | Exclude |
| 297 | Researchers should inform young people about any check-in process at the start of their active involvement.                                                                                           |         |         | New item | 95.83% | 96.00% | Include |
| 298 | <i>Researchers should check in with young people:</i><br>formally                                                                                                                                     |         |         | New item | 41.67% | 40.00% | Exclude |
| 299 | informally                                                                                                                                                                                            |         |         | New item | 70.83% | 64.00% | Exclude |
| 300 | <i>When checking in with young people, researchers should give them the opportunity to:</i><br>share experiences                                                                                      | 96.30%  | 100.00% | Include  |        |        |         |
| 301 | ask questions                                                                                                                                                                                         | 100.00% | 100.00% | Include  |        |        |         |
| 302 | provide feedback                                                                                                                                                                                      | 100.00% | 96.43%  | Include  |        |        |         |
| 303 | <i>If conducting a check in with young people, researchers should do so:</i><br>using the mode of communication that the young person prefers (e.g. phone, SMS, in person)                            | 100.00% | 96.43%  | Include  |        |        |         |
| 304 | in-person only                                                                                                                                                                                        | 14.81%  | 0.00%   | Exclude  |        |        |         |
| 305 | via survey                                                                                                                                                                                            | 22.22%  | 3.57%   | Exclude  |        |        |         |
| 306 | If conducting a check in with young people, researchers should inform young people that if they don't respond to follow-up calls, then the research team will contact their support person            | 55.56%  | 42.86%  | Exclude  |        |        |         |
| 307 | Researchers should provide their personal contact details to young people, so the line of communication is always open                                                                                | 33.33%  | 14.29%  | Exclude  |        |        |         |
| 308 | Researchers should not provide their personal contact details to young people                                                                                                                         | 62.96%  | 46.43%  | Exclude  |        |        |         |
| 309 | <i>Responsibility to follow-up with young people after an involvement activity should be:</i><br>the researcher                                                                                       | 55.56%  | 71.43%  | Exclude  |        |        |         |
| 310 | a clinician                                                                                                                                                                                           | 70.37%  | 28.57%  | Exclude  |        |        |         |
| 311 | shared across several team members                                                                                                                                                                    | 74.07%  | 60.71%  | Exclude  |        |        |         |
| 312 | If, after conducting a 'check-in' the researcher is concerned about the young person, they should consult the safety and wellbeing plan on how to best to support the young person (if they have one) | 96.30%  | 96.43%  | Include  |        |        |         |
| 313 | <b>Section 10: Prevention and responding to distress and/or suicide risk</b><br><i>Regardless of how suicide is being discussed, researchers should:</i><br>provide a content warning                 | 92.59%  | 78.57%  | Rerate   | 83.33% | 88.00% | Include |
| 314 | tell young people how long the topic will be discussed for allow young people to step away while the topic is being                                                                                   | 81.48%  | 71.43%  | Rerate   | 70.83% | 88.00% | Exclude |
| 315 | discussed                                                                                                                                                                                             | 92.59%  | 89.29%  | Include  |        |        |         |
| 316 | notify young people when to come back                                                                                                                                                                 | 88.89%  | 82.14%  | Include  |        |        |         |

|                                                                                                                                                                                               |     |         |        |          |         |        |         |
|-----------------------------------------------------------------------------------------------------------------------------------------------------------------------------------------------|-----|---------|--------|----------|---------|--------|---------|
| encourage young people to use content warnings before sharing their lived or living experiences of suicide, self-harm or trauma                                                               | 317 | 70.37%  | 67.86% | Exclude  |         |        |         |
| remind young people that it can be normal to feel uncomfortable when discussing suicide                                                                                                       | 318 | 96.30%  | 92.86% | Include  |         |        |         |
| <i>If specifically discussing lived or living experiences of suicide, methods or details, or other aspects of suicide that the researcher should:</i>                                         |     |         |        |          |         |        |         |
| provide a content warning                                                                                                                                                                     | 319 | 96.30%  | 82.14% | Include  |         |        |         |
| tell young people how long the topic will be discussed for                                                                                                                                    | 320 | 85.19%  | 82.14% | Include  |         |        |         |
| allow young people to step away while the topic is being discussed                                                                                                                            | 321 | 96.30%  | 89.29% | Include  |         |        |         |
| notify young people when to come back                                                                                                                                                         | 322 | 85.19%  | 85.71% | Include  |         |        |         |
| encourage young people to use content warnings before sharing their lived or living experiences of suicide, self-harm or trauma                                                               | 323 | 85.19%  | 78.57% | Rerate   | 79.17%  | 84.00% | Exclude |
| Researchers should monitor young people's mood throughout any involvement activity                                                                                                            | 324 | 85.19%  | 75.00% | Rerate   | 91.67%  | 84.00% | Include |
| <i>If monitoring young people's mood throughout the involvement activity, researchers should do this through:</i>                                                                             |     |         |        |          |         |        |         |
| observing body language                                                                                                                                                                       | 325 | 81.48%  | 85.71% | Include  |         |        |         |
| asking young people if they are ok                                                                                                                                                            | 326 | 66.67%  | 82.14% | Rerate   | 79.17%  | 84.00% | Exclude |
| asking young people to rate their mood before and after, e.g., verbally, via text message                                                                                                     | 327 | 66.67%  | 50.00% | Exclude  |         |        |         |
| Researchers should support young people's return to involvement activities after they have taken a break (e.g. updating them on progress while they have been away).                          | 328 |         |        | New item | 100.00% | 88.00% | Include |
| If appropriate, researchers should provide young people who opt out of involvement activities with alternative activities to help them stay actively involved                                 | 329 |         |        | New item | 75.00%  | 76.00% | Exclude |
| Researchers should invite young people to choose a cue that they can use to indicate they wish to step away from the activity                                                                 | 330 |         |        | New item | 95.83%  | 88.00% | Include |
| After the involvement activity, researchers should ask the young people if it was distressing for them                                                                                        | 331 | 70.37%  | 57.14% | Exclude  |         |        |         |
| Researchers should ask young people to let them know if they are feeling distressed and would like support                                                                                    | 332 | 100.00% | 96.43% | Include  |         |        |         |
| Researchers should trust young people to inform them if they are finding things too distressing                                                                                               | 333 | 88.89%  | 82.14% | Include  |         |        |         |
| <i>Researchers should offer young people a range of ways to communicate their need to pause or opt out (e.g., emojis (if online), safety words, hand signals when leaving the room etc.):</i> |     |         |        |          |         |        |         |
| in online settings                                                                                                                                                                            | 334 | 100.00% | 96.43% | Include  |         |        |         |
| at in-person settings                                                                                                                                                                         | 335 | 96.30%  | 96.43% | Include  |         |        |         |
| <i>Researchers should not automatically stop an involvement activity if a person appears distressed:</i>                                                                                      |     |         |        |          |         |        |         |
| in online settings                                                                                                                                                                            | 336 | 44.44%  | 35.71% | Exclude  |         |        |         |
| at in-person settings                                                                                                                                                                         | 337 | 40.74%  | 35.71% | Exclude  |         |        |         |
| <i>Researchers should automatically stop an involvement activity if a person appears distressed</i>                                                                                           |     |         |        |          |         |        |         |
| in online settings                                                                                                                                                                            | 338 | 22.22%  | 14.29% | Exclude  |         |        |         |
| at in-person settings                                                                                                                                                                         | 339 | 25.93%  | 14.29% | Exclude  |         |        |         |
| Researchers should support young people to be autonomous in making decisions about opting out or pausing their active involvement in particular aspects of involvement activities             | 340 | 96.30%  | 96.43% | Include  |         |        |         |
| and projects                                                                                                                                                                                  |     |         |        |          |         |        |         |
| Researchers should support young people to take a break from involvement activities if distressed                                                                                             | 341 | 100.00% | 96.43% | Include  |         |        |         |

|                                                                                                                          |         |         |         |         |        |         |  |
|--------------------------------------------------------------------------------------------------------------------------|---------|---------|---------|---------|--------|---------|--|
| Young people should consider what topics are likely to be distressing and let the researcher know prior to the           |         |         |         |         |        |         |  |
| 342 involvement activity                                                                                                 | 85.19%  | 82.14%  | Include |         |        |         |  |
| Young people should tell researchers if they are feeling upset or distressed and want to opt out of being involved in an |         |         |         |         |        |         |  |
| 343 involvement activity                                                                                                 | 100.00% | 96.43%  | Include |         |        |         |  |
| <i>If a young person becomes distressed, researchers should:</i>                                                         |         |         |         |         |        |         |  |
| let the young person know that they've noticed the young                                                                 |         |         |         |         |        |         |  |
| 344 person's distress                                                                                                    | 85.19%  | 89.29%  | Include |         |        |         |  |
| ask the young person about why they are feeling                                                                          |         |         |         |         |        |         |  |
| 345 distressed                                                                                                           | 59.26%  | 50.00%  | Exclude |         |        |         |  |
| 346 check whether they want to stop, break, or continue                                                                  | 96.30%  | 100.00% | Include |         |        |         |  |
| 347 conduct a risk assessment                                                                                            | 55.56%  | 32.14%  | Exclude |         |        |         |  |
| enact the safety and wellbeing plan, if they young person                                                                |         |         |         |         |        |         |  |
| 348 has one                                                                                                              | 70.37%  | 75.00%  | Rerate  | 100.00% | 92.00% | Include |  |
| 349 offer to link the young person in with a clinician                                                                   | 96.30%  | 53.57%  | Rerate  | 95.83%  | 68.00% | Exclude |  |
| provide the young person with contact information for                                                                    |         |         |         |         |        |         |  |
| 350 helplines and support services                                                                                       | 77.78%  | 82.14%  | Rerate  | 91.67%  | 88.00% | Include |  |
| 351 assume the young person will seek support on their own                                                               | 3.70%   | 7.14%   | Exclude |         |        |         |  |
| 352 normalise any feelings of distress to the young person                                                               | 66.67%  | 75.00%  | Exclude |         |        |         |  |
| respect a young person's choice not to be actively                                                                       |         |         |         |         |        |         |  |
| 353 involved                                                                                                             | 100.00% | 96.43%  | Include |         |        |         |  |
| conduct all communication with the young person in a                                                                     |         |         |         |         |        |         |  |
| 354 quiet place                                                                                                          | 77.78%  | 75.00%  | Rerate  | 91.67%  | 64.00% | Exclude |  |
| 355 check back in with the young person later (e.g., next day)                                                           | 88.89%  | 85.71%  | Include |         |        |         |  |
| check in with other young people, if the distress occurs in                                                              |         |         |         |         |        |         |  |
| 356 a group involvement activity                                                                                         | 92.59%  | 89.29%  | Include |         |        |         |  |
| <i>If a young person becomes distressed, clinicians should:</i>                                                          |         |         |         |         |        |         |  |
| let the young person know that they've noticed the young                                                                 |         |         |         |         |        |         |  |
| 357 person's distress                                                                                                    | 85.19%  | 78.57%  | Rerate  | 87.50%  | 88.00% | Include |  |
| ask the young person about why they are feeling                                                                          |         |         |         |         |        |         |  |
| 358 distressed                                                                                                           | 66.67%  | 46.43%  | Exclude |         |        |         |  |
| 359 check whether they want to stop, break, or continue                                                                  | 96.30%  | 89.29%  | Include |         |        |         |  |
| 360 conduct a risk assessment                                                                                            | 77.78%  | 35.71%  | Exclude |         |        |         |  |
| enact the safety and wellbeing plan, if they young person                                                                |         |         |         |         |        |         |  |
| 361 has one                                                                                                              | 85.19%  | 67.86%  | Rerate  | 91.67%  | 84.00% | Include |  |
| 362 offer to link the young person in with a clinician                                                                   | 85.19%  | 50.00%  | Rerate  | 79.17%  | 60.00% | Exclude |  |
| provide the young person with contact information for                                                                    |         |         |         |         |        |         |  |
| 363 helplines and support services                                                                                       | 77.78%  | 78.57%  | Rerate  | 87.50%  | 80.00% | Include |  |
| 364 assume the young person will seek support on their own                                                               | 7.41%   | 17.86%  | Exclude |         |        |         |  |
| 365 normalise any feelings of distress to the young person                                                               | 77.78%  | 64.29%  | Exclude |         |        |         |  |
| respect a young person's choice not to be actively                                                                       |         |         |         |         |        |         |  |
| 366 involved                                                                                                             | 100.00% | 89.29%  | Include |         |        |         |  |
| conduct all communication with the young person in a                                                                     |         |         |         |         |        |         |  |
| 367 quiet place                                                                                                          | 88.89%  | 75.00%  | Rerate  | 95.83%  | 68.00% | Exclude |  |
| 368 check back in with the young person later (e.g., next day)                                                           | 96.30%  | 75.00%  | Rerate  | 87.50%  | 76.00% | Exclude |  |
| check in with other young people, if the distress occurs in                                                              |         |         |         |         |        |         |  |
| 369 a group involvement activity                                                                                         | 92.59%  | 71.43%  | Rerate  | 70.83%  | 68.00% | Exclude |  |
| <i>If a young person is thought to be at immediate risk of suicide, researchers should:</i>                              |         |         |         |         |        |         |  |
| 370 inform the young person's emergency contact                                                                          | 85.19%  | 89.29%  | Include |         |        |         |  |
| if possible, obtain the young person's consent to contact                                                                |         |         |         |         |        |         |  |
| 371 their emergency contacts                                                                                             | 88.89%  | 92.86%  | Include |         |        |         |  |

|                                                                                                                              |         |         |         |        |        |         |
|------------------------------------------------------------------------------------------------------------------------------|---------|---------|---------|--------|--------|---------|
| if possible, inform young people that their emergency                                                                        |         |         |         |        |        |         |
| 372 contacts are being contacted                                                                                             | 85.19%  | 96.43%  | Include |        |        |         |
| 373 contact emergency services                                                                                               | 51.85%  | 71.43%  | Exclude |        |        |         |
| if possible, remain with the young person until help                                                                         |         |         |         |        |        |         |
| 374 arrives or maintain continuous contact with the person                                                                   | 92.59%  | 92.86%  | Include |        |        |         |
| <i>If a young person is thought to be at immediate risk of suicide, clinicians should:</i>                                   |         |         |         |        |        |         |
| 375 inform the young person's emergency contact                                                                              | 96.30%  | 82.14%  | Include |        |        |         |
| If possible, obtain the young person's consent to contact                                                                    |         |         |         |        |        |         |
| 376 their emergency contacts                                                                                                 | 96.30%  | 89.29%  | Include |        |        |         |
| c.if possible, inform young people that their emergency                                                                      |         |         |         |        |        |         |
| 377 contacts are being contacted                                                                                             | 96.30%  | 89.29%  | Include |        |        |         |
| 378 contact emergency services                                                                                               | 62.96%  | 71.43%  | Exclude |        |        |         |
| if possible, remain with the young person until help                                                                         |         |         |         |        |        |         |
| 379 arrives or maintain continuous contact with the person                                                                   | 100.00% | 85.71%  | Include |        |        |         |
| <i>If a young person wishes to speak with a clinician and the appropriate clinicians is not present, researchers should:</i> |         |         |         |        |        |         |
| obtain their consent to provide a clinician with their first                                                                 |         |         |         |        |        |         |
| 380 name and mobile number                                                                                                   | 85.19%  | 89.29%  | Include |        |        |         |
| 381 provide the clinician with the relevant details                                                                          | 88.89%  | 75.00%  | Rerate  | 95.83% | 80.00% | Include |
| if possible, remain in contact with the young person until                                                                   |         |         |         |        |        |         |
| 382 the clinician has made contact with them                                                                                 | 85.19%  | 78.57%  | Rerate  | 87.50% | 84.00% | Include |
| if the clinician needs to call at a later time, researchers                                                                  |         |         |         |        |        |         |
| should inform the participant and where possible provide                                                                     |         |         |         |        |        |         |
| 383 the specific time that the clinician will contact them                                                                   | 100.00% | 92.86%  | Include |        |        |         |
| Young people should tell researchers if they feel their active                                                               |         |         |         |        |        |         |
| 384 involvement has increased their distress or risk                                                                         | 96.30%  | 96.43%  | Include |        |        |         |
| Young people should provide support to other participants                                                                    |         |         |         |        |        |         |
| 385 experiencing distress                                                                                                    | 22.22%  | 21.43%  | Exclude |        |        |         |
| If using social media to communicate with young people,                                                                      |         |         |         |        |        |         |
| researchers should moderate posts from young people                                                                          |         |         |         |        |        |         |
| 386 about their own suicidal thoughts or feelings                                                                            | 74.07%  | 50.00%  | Exclude |        |        |         |
| <b>Section 11: Sharing lived or living experience of suicide</b>                                                             |         |         |         |        |        |         |
| Researchers should be clear with young people about if they                                                                  |         |         |         |        |        |         |
| will be expected to share their lived or living experience at                                                                |         |         |         |        |        |         |
| 387 any stage                                                                                                                | 100.00% | 100.00% | Include |        |        |         |
| Researchers should ask young people what they do and                                                                         |         |         |         |        |        |         |
| 388 don't want to share of their lived or living experience                                                                  | 85.19%  | 82.14%  | Include |        |        |         |
| Researchers should not ask young people to share their lived                                                                 |         |         |         |        |        |         |
| 389 or living experience                                                                                                     | 25.93%  | 25.00%  | Exclude |        |        |         |
| Researchers should only ask young people to share the parts                                                                  |         |         |         |        |        |         |
| of their lived or living experience that are relevant to the                                                                 |         |         |         |        |        |         |
| 390 project                                                                                                                  | 59.26%  | 50.00%  | Exclude |        |        |         |
| Researchers should inform young people of what will happen                                                                   |         |         |         |        |        |         |
| with the information if young people share their lived or                                                                    |         |         |         |        |        |         |
| 391 living experience                                                                                                        | 100.00% | 100.00% | Include |        |        |         |
| <i>Researchers should provide support to young people who are</i>                                                            |         |         |         |        |        |         |
| <i>sharing their lived or living experience by:</i>                                                                          |         |         |         |        |        |         |
| assisting them to plan which aspects of their lived or living                                                                |         |         |         |        |        |         |
| 392 experience they wish to share                                                                                            | 70.37%  | 64.29%  | Exclude |        |        |         |
| 393 assisting them to understand their personal boundaries                                                                   | 88.89%  | 67.86%  | Rerate  | 95.83% | 72.00% | Exclude |
| 394 respecting their personal boundaries                                                                                     | 100.00% | 92.86%  | Include |        |        |         |
| assisting them to understand how to safely communicate                                                                       |         |         |         |        |        |         |
| 395 lived or living experience of suicide (e.g., safe language)                                                              | 100.00% | 85.71%  | Include |        |        |         |
| providing sufficient time to share their lived or living                                                                     |         |         |         |        |        |         |
| 396 experience                                                                                                               | 100.00% | 96.43%  | Include |        |        |         |



|                                                                                                                                                                                        |             |        |          |        |         |         |
|----------------------------------------------------------------------------------------------------------------------------------------------------------------------------------------|-------------|--------|----------|--------|---------|---------|
| <i>If sharing their lived or living experience, young people should:</i>                                                                                                               |             |        |          |        |         |         |
| use safe language (e.g., avoiding stigmatising or glorifying suicide, avoid discussing suicide methods)                                                                                | 397 88.89%  | 85.71% | Include  |        |         |         |
| only share parts of their lived or living experience that they're happy for others to know                                                                                             | 398 92.59%  | 89.29% | Include  |        |         |         |
| emphasise aspects of hope and recovery (e.g., emphasising what helped them, positive turning points)                                                                                   | 399 48.15%  | 50.00% | Exclude  |        |         |         |
| seek permission from others who are part of their stories before disclosing these aspects of their lived or living experience                                                          | 400 51.85%  | 53.57% | Exclude  |        |         |         |
| consider the negative consequences of sharing their lived or living experience with other people                                                                                       | 401 85.19%  | 57.14% | Rerate   | 83.33% | 80.00%  | Include |
| <i>Young people should only share their lived or living experience:</i>                                                                                                                |             |        |          |        |         |         |
| in one-on-one situations                                                                                                                                                               | 402 37.04%  | 3.57%  | Exclude  |        |         |         |
| in group situations                                                                                                                                                                    | 403 18.52%  | 0.00%  | Exclude  |        |         |         |
| when they feel ready to                                                                                                                                                                | 404 100.00% | 89.29% | Include  |        |         |         |
| when they trust the researcher                                                                                                                                                         | 405 85.19%  | 75.00% | Rerate   | 62.50% | 76.00%  | Exclude |
| when they trust the rest of the group (where appropriate) when they feel they have the support they need (e.g., professional / psychological support, support from family and friends) | 406 77.78%  | 78.57% | Rerate   | 58.33% | 76.00%  | Exclude |
| Researchers should not expect young people to share their lived or living experience                                                                                                   | 407 88.89%  | 75.00% | Rerate   | 87.50% | 84.00%  | Include |
|                                                                                                                                                                                        | 408         |        | New item | 70.83% | 80.00%  | Exclude |
| Researchers should connect young people with specialised organisations to support them with sharing their story                                                                        | 409         |        | New item | 75.00% | 40.00%  | Exclude |
| Researchers should remind young people at each stage of the research project that they should contribute as much or as little of their story as they want to, on any given day         | 410         |        | New item | 95.83% | 100.00% | Include |
| <b>Part 2: Principles for actively involving young people in specific stages of the research cycle</b>                                                                                 |             |        |          |        |         |         |
| <b>Section 1: Active involvement in study planning and ethics approval</b>                                                                                                             |             |        |          |        |         |         |
| Researchers should involve young people in designing research studies (e.g., contributing to decisions on research questions and study methodology)                                    | 411 88.89%  | 96.43% | Include  |        |         |         |
| <i>Researchers should seek ethics approval for the following types of youth involvement in suicide research involvement activities:</i>                                                |             |        |          |        |         |         |
| youth advisory groups                                                                                                                                                                  | 412 92.59%  | 50.00% | Rerate   | 79.17% | 44.00%  | Exclude |
| co-design (e.g., of an intervention)                                                                                                                                                   | 413 100.00% | 67.86% | Rerate   | 87.50% | 56.00%  | Exclude |
| recruitment roles                                                                                                                                                                      | 414 81.48%  | 71.43% | Rerate   | 83.33% | 68.00%  | Exclude |
| data analysis                                                                                                                                                                          | 415 74.07%  | 64.29% | Exclude  |        |         |         |
| data collection (e.g., conducting interviews, administering surveys)                                                                                                                   | 416 92.59%  | 78.57% | Rerate   | 79.17% | 88.00%  | Exclude |
| co-authorship (writing papers)                                                                                                                                                         | 417 81.48%  | 46.43% | Rerate   | 58.33% | 36.00%  | Exclude |
| dissemination (sharing research findings, e.g. speaking at events)                                                                                                                     | 418 92.59%  | 50.00% | Rerate   | 62.50% | 44.00%  | Exclude |
| Researchers should consult with an ethics committee representative about young people's involvement prior to submitting an application                                                 | 419 88.89%  | 32.14% | Rerate   | 83.33% | 48.00%  | Exclude |
| Researchers should include a detailed risk management protocol in the ethics application for young people who will be actively involved                                                | 420 100.00% | 78.57% | Rerate   | 95.83% | 92.00%  | Include |
| Researchers should allow extra time for the ethics submission process                                                                                                                  | 421 85.19%  | 75.00% | Rerate   | 75.00% | 92.00%  | Exclude |
| Where possible researchers should involve young people in the preparation of the ethics application                                                                                    | 422         |        | New item | 62.50% | 84.00%  | Exclude |

|                                                                                                                                                                                                          |                                                                                                                                                                                                         |         |        |          |        |        |         |
|----------------------------------------------------------------------------------------------------------------------------------------------------------------------------------------------------------|---------------------------------------------------------------------------------------------------------------------------------------------------------------------------------------------------------|---------|--------|----------|--------|--------|---------|
| 423                                                                                                                                                                                                      | Researchers should work with young people to educate ethics committees on safe and meaningful involvement                                                                                               |         |        | New item | 91.67% | 80.00% | Include |
| 424                                                                                                                                                                                                      | Researchers should describe to ethics committees any previous experience with actively involving young people with lived or living experience in suicide research                                       |         |        | New item | 91.67% | 88.00% | Include |
| 425                                                                                                                                                                                                      | When developing the ethics application, researchers should refer to any previous studies with ethics approval, to demonstrate competence and expertise in conducting suicide research with young people | 85.19%  | 82.14% | Include  |        |        |         |
| <b>Section 2: Participant recruitment for a study</b>                                                                                                                                                    |                                                                                                                                                                                                         |         |        |          |        |        |         |
| 426                                                                                                                                                                                                      | Young people should lead the recruitment of other young people as study participants for suicide research                                                                                               | 33.33%  | 25.00% | Exclude  |        |        |         |
| 427                                                                                                                                                                                                      | Young people should play a supporting role in recruiting study participants for suicide research (e.g., share social media posts)                                                                       | 70.37%  | 46.43% | Exclude  |        |        |         |
| <b>Section 3: Data analysis and dissemination</b>                                                                                                                                                        |                                                                                                                                                                                                         |         |        |          |        |        |         |
| <i>Researchers should involve young people in the following suicide research data analysis involvement activities:</i>                                                                                   |                                                                                                                                                                                                         |         |        |          |        |        |         |
| 428                                                                                                                                                                                                      | qualitative (e.g., reading and interpreting interview transcripts)                                                                                                                                      | 55.56%  | 85.71% | Rerate   | 58.33% | 68.00% | Exclude |
| 429                                                                                                                                                                                                      | quantitative (e.g. analysing numerical datasets)                                                                                                                                                        | 66.67%  | 75.00% | Exclude  |        |        |         |
| <i>If involving young people in suicide research qualitative data analysis, researchers should:</i>                                                                                                      |                                                                                                                                                                                                         |         |        |          |        |        |         |
| 430                                                                                                                                                                                                      | inform them of nature or focus of data prior to commencing                                                                                                                                              | 96.30%  | 96.43% | Include  |        |        |         |
| 431                                                                                                                                                                                                      | encourage them to consider potential distress, given the topic                                                                                                                                          | 100.00% | 96.43% | Include  |        |        |         |
| 432                                                                                                                                                                                                      | give them the opportunity to decline at any point of the analysis without impacting their future active involvement                                                                                     | 100.00% | 96.43% | Include  |        |        |         |
| 433                                                                                                                                                                                                      | provide relevant training                                                                                                                                                                               | 96.30%  | 92.86% | Include  |        |        |         |
| 434                                                                                                                                                                                                      | provide support in how to conduct qualitative data analysis                                                                                                                                             | 100.00% | 92.00% | Include  |        |        |         |
| <i>If involving young people in suicide research quantitative data analysis, researchers should:</i>                                                                                                     |                                                                                                                                                                                                         |         |        |          |        |        |         |
| 435                                                                                                                                                                                                      | inform them of nature or focus of data prior to commencing                                                                                                                                              | 96.30%  | 89.29% | Include  |        |        |         |
| 436                                                                                                                                                                                                      | encourage them to consider potential distress, given the topic                                                                                                                                          | 100.00% | 92.86% | Include  |        |        |         |
| 437                                                                                                                                                                                                      | give them the opportunity to decline at any point of the analysis without impacting their future active involvement                                                                                     | 96.30%  | 96.43% | Include  |        |        |         |
| 438                                                                                                                                                                                                      | provide relevant training                                                                                                                                                                               | 96.30%  | 92.86% | Include  |        |        |         |
| 439                                                                                                                                                                                                      | Researchers should review any public-facing communication created by young people to ensure safe communication about suicide and that it aligns with ethics approved materials                          | 96.30%  | 89.29% | Include  |        |        |         |
| <i>If a young person is attending an event or participating in a media opportunity, researchers should ensure that a member of the research team or other staff member is available to:</i>              |                                                                                                                                                                                                         |         |        |          |        |        |         |
| 440                                                                                                                                                                                                      | help them prepare                                                                                                                                                                                       | 92.59%  | 85.71% | Include  |        |        |         |
| 441                                                                                                                                                                                                      | attend the event with them                                                                                                                                                                              | 74.07%  | 75.00% | Rerate   | 83.33% | 72.00% | Exclude |
| 442                                                                                                                                                                                                      | check in / debrief with them after the event                                                                                                                                                            | 92.59%  | 92.86% | Include  |        |        |         |
| <i>If a young person is attending an event or participating in a media opportunity related to the research, researchers should ensure that a person with lived or living experience is available to:</i> |                                                                                                                                                                                                         |         |        |          |        |        |         |
| 443                                                                                                                                                                                                      | help them prepare                                                                                                                                                                                       |         |        | New item | 95.83% | 88.00% | Include |
| 444                                                                                                                                                                                                      | attend the event with them                                                                                                                                                                              |         |        | New item | 79.17% | 48.00% | Exclude |
| 445                                                                                                                                                                                                      | check in / debrief with them after the event                                                                                                                                                            |         |        | New item | 91.67% | 88.00% | Include |

| <b>Section 4: Active involvement in impact and evaluation</b>                                                                                                               |                                                          |         |        |          |                        |
|-----------------------------------------------------------------------------------------------------------------------------------------------------------------------------|----------------------------------------------------------|---------|--------|----------|------------------------|
| <i>Researchers should evaluate the impact of young people's active involvement after each activity:</i>                                                                     |                                                          |         |        |          |                        |
| 446                                                                                                                                                                         | on young people's suicidal thoughts and feelings         | 88.46%  | 82.14% | Include  |                        |
| 447                                                                                                                                                                         | on themselves                                            | 76.92%  | 82.14% | Rerate   | 79.17% 88.00% Exclude  |
| 448                                                                                                                                                                         | on the research itself                                   | 76.92%  | 75.00% | Rerate   | 79.17% 88.00% Exclude  |
| <i>Researchers should evaluate the impact of young people's active involvement at the end of the whole project:</i>                                                         |                                                          |         |        |          |                        |
| 449                                                                                                                                                                         | on young people's suicidal thoughts and feelings         | 100.00% | 92.86% | Include  |                        |
| 450                                                                                                                                                                         | on themselves                                            | 100.00% | 82.14% | Include  |                        |
| 451                                                                                                                                                                         | on the research itself                                   | 100.00% | 92.86% | Include  |                        |
| <i>Researchers should evaluate:</i>                                                                                                                                         |                                                          |         |        |          |                        |
| the short-term impact of active involvement for young people (e.g., immediately after an involvement activity)                                                              |                                                          |         |        |          |                        |
| 452                                                                                                                                                                         |                                                          | 100.00% | 89.29% | Include  |                        |
| the longer-term impact of active involvement for young people for young people (e.g., 3 months after an involvement activity)                                               |                                                          |         |        |          |                        |
| 453                                                                                                                                                                         |                                                          | 100.00% | 78.57% | Rerate   | 87.50% 92.00% Include  |
| <i>Researchers should ask for feedback from young people:</i>                                                                                                               |                                                          |         |        |          |                        |
| formally (e.g., via surveys, interviews)                                                                                                                                    |                                                          |         |        |          |                        |
| 454                                                                                                                                                                         |                                                          | 84.62%  | 64.29% | Rerate   | 87.50% 80.00% Include  |
| informally (e.g., casual individual or group discussion)                                                                                                                    |                                                          |         |        |          |                        |
| 455                                                                                                                                                                         |                                                          | 92.31%  | 78.57% | Rerate   | 83.33% 88.00% Include  |
| <i>In any evaluation, researchers should ask young people:</i>                                                                                                              |                                                          |         |        |          |                        |
| If they found their active involvement distressing                                                                                                                          |                                                          |         |        |          |                        |
| 456                                                                                                                                                                         |                                                          | 84.62%  | 96.43% | Include  |                        |
| If there were any positive outcomes resulting from their active involvement (e.g., increased skills, confidence, financial, sense of worth).                                |                                                          |         |        |          |                        |
| 457                                                                                                                                                                         |                                                          | 96.15%  | 96.43% | Include  |                        |
| if they would like to speak further about their experience                                                                                                                  |                                                          |         |        |          |                        |
| 458                                                                                                                                                                         | with a member of the research team or clinician          | 96.15%  | 89.29% | Include  |                        |
| how researchers could improve active involvement in                                                                                                                         |                                                          |         |        |          |                        |
| 459                                                                                                                                                                         | suicide research                                         | 96.15%  | 96.43% | Include  |                        |
| 460                                                                                                                                                                         | how confident they felt about talking about suicide      | 76.92%  | 71.43% | Rerate   | 62.50% 76.00% Exclude  |
| 461                                                                                                                                                                         | how comfortable they felt talking about suicide          | 76.92%  | 78.57% | Rerate   | 87.50% 88.00% Include  |
| Researchers should conduct a pre-post evaluation study to                                                                                                                   |                                                          |         |        |          |                        |
| 462                                                                                                                                                                         | evaluate changes in suicidal thoughts and feelings       | 88.46%  | 35.71% | Rerate   | 83.33% 48.00% Exclude  |
| Researchers should tell young people who they can provide                                                                                                                   |                                                          |         |        |          |                        |
| 463                                                                                                                                                                         | feedback to if they want to                              | 100.00% | 89.29% | Include  |                        |
| Researchers should ask family and community members                                                                                                                         |                                                          |         |        |          |                        |
| 464                                                                                                                                                                         | about how active involvement impacted their young people | 30.77%  | 14.29% | Exclude  |                        |
| Researchers should include mechanisms in the evaluation process that flag and prompt follow up if a young person indicates they have experienced recent or current suicidal |                                                          |         |        |          |                        |
| 465                                                                                                                                                                         | thoughts and feelings                                    | 92.31%  | 67.86% | Rerate   | 100.00% 72.00% Exclude |
| Researchers should fully document the processes they used to engage young people with lived or living experience to                                                         |                                                          |         |        |          |                        |
| 466                                                                                                                                                                         | ensure transparency and to aid future research efforts   | 96.15%  | 96.43% | Include  |                        |
| If using a mechanism to flag and prompt follow up, researchers should inform young people about this prior to                                                               |                                                          |         |        |          |                        |
| 467                                                                                                                                                                         | the evaluation.                                          |         |        | New item | 70.83% 96.00% Exclude  |

\*Items excluded due to dependent item being excluded
