# Supplementary figures and images for: О некоторых методиках моделирования управляемых летательных аппаратов в пакете MSC/Nastran
Source: Atypon-hosted journal article supplement (doi:10.1027/0227-5910/a000938), 2012-01-01

**Number of items included, excluded and re-rated across the two questionnaire rounds**

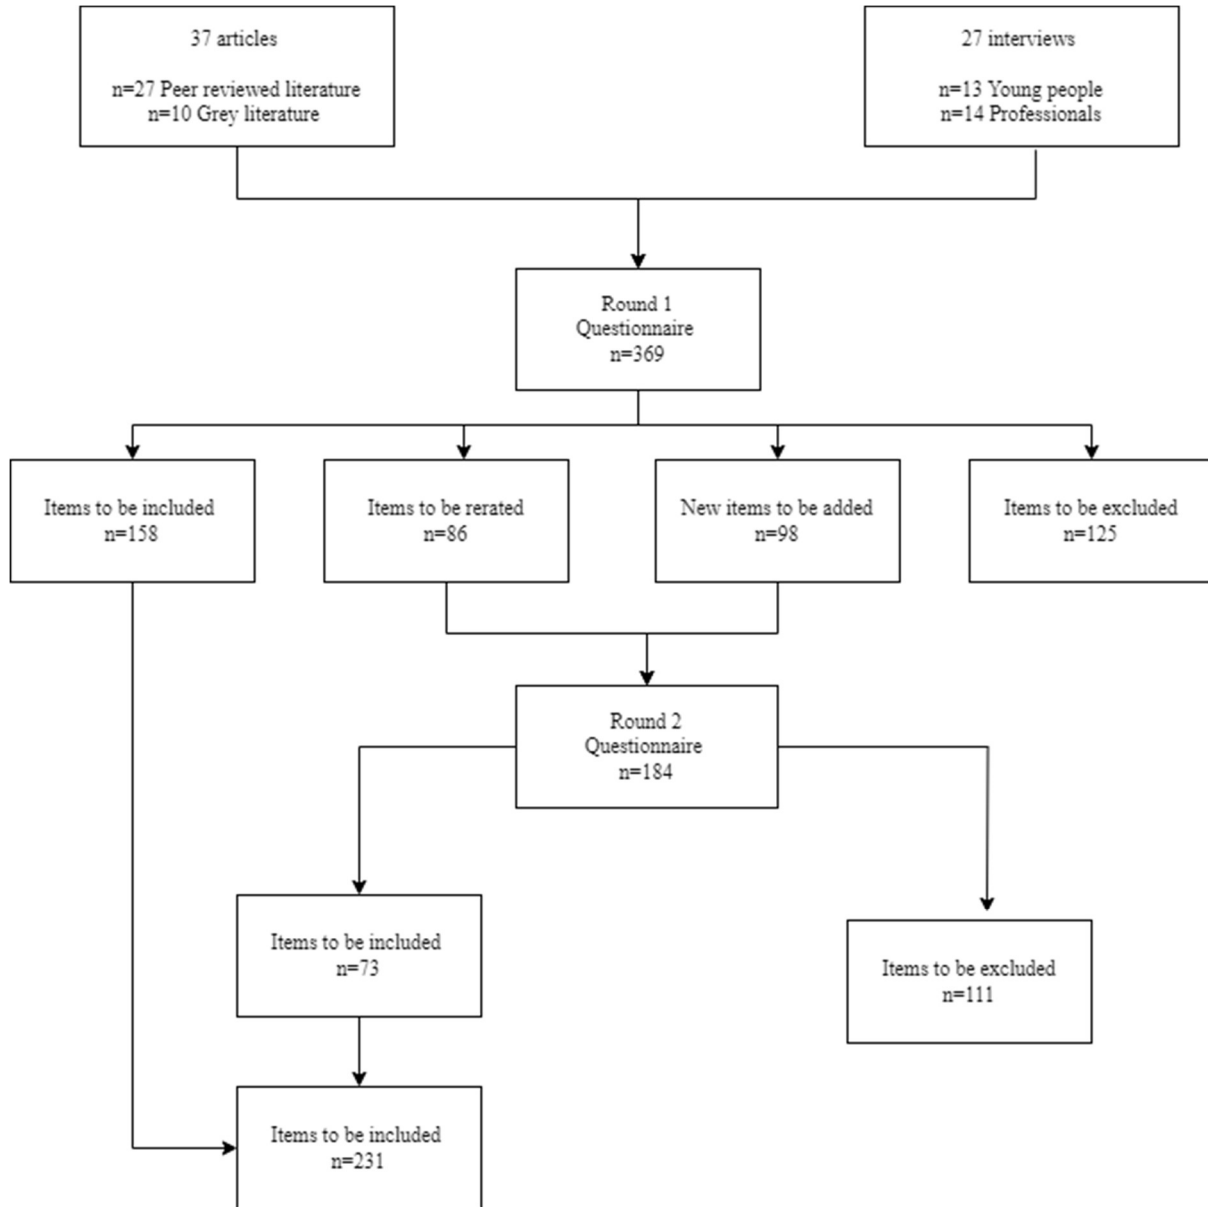

Supplement: 0227-5910_a000938_esm1.pdf [file 0227-5910_a000938_esm1.pdf]
